# Supplementary material for: Dauricine Attenuates Spatial Memory Impairment and Alzheimer-Like Pathologies by Enhancing Mitochondrial Function in a Mouse Model of Alzheimer's Disease
Source: Front Cell Dev Biol. 2021 Feb 5;8:624339. doi: 10.3389/fcell.2020.624339 (PMC7902075; doi:10.3389/fcell.2020.624339)
Supplement: Supplementary Table 2 — Differentially expressed proteins in DAU-treated vs. untreated 3xTg-AD mice. [file Table_2.XLSX]

## Sheet: 3xTg vs WT
Protein classification	Accession No.	Protein name	Uniport	3xTg versus WT
				Ratione	P-Value
ER stress-associated proteins	CALR_MOUSE	Calreticulin	P14211	1.22	0.047
	CALM_MOUSE	Calmodulin	P62204	1.56	0.041
	PSA4_MOUSE	Proteasome subunit alpha type-4	Q9R1P0	1.42	0.021
	TCPZ_MOUSE	T-complex protein 1 subunit zeta	P80317	-1.45	0.0014
Oxidative stress-associated proteins	PRDX1_MOUSE	Peroxiredoxin-1	P35700	1.19	0.0079
	PARK7_MOUSE	Protein DJ-1	Q99LX0	1.2	0.026
	IDHC_MOUSE	Isocitrate dehydrogenase [NADP] cytoplasmic	O88844	1.47	0.025
	PEBP1_MOUSE	Phosphatidylethanolamine-binding protein 1	P70296	1.08	0.02
	SODM_MOUSE	Superoxide dismutase [Mn], mitochondrial	P09671	1.63	0.0029
Synaptic proteins	SYN2_MOUSE	Synapsin-2	Q64332	-1.19	0.025
	DYN1_MOUSE	Dynamin-1	P39053	-1.18	0.035
	SNP25_MOUSE	Synaptosomal-associated protein 25	P60879	1.17	0.04
	AMPH_MOUSE	Amphiphysin	Q7TQF7	1.47	0.009
	DPYL4_MOUSE	Dihydropyrimidinase-related protein 4	O35098	-1.26	0.00068
	SYN1_MOUSE	Synapsin-1	O88935	-1.21	0.048
Mitochondrial respiration and metabolism	NDUS1_MOUSE	NADH-ubiquinone oxidoreductase 75 kDa subunit, mitochondrial	Q91VD9	-1.17	0.0033
	ATPB_MOUSE	ATP synthase subunit beta, mitochondrial	P56480	1.18	0.0037
	ATPO_MOUSE	ATP synthase subunit O, mitochondrial	Q9DB20	1.15	0.0048
	IDH3A_MOUSE	Isocitrate dehydrogenase [NAD] subunit alpha, mitochondrial	Q9D6R2	1.26	0.006
	ACON_MOUSE	Aconitate hydratase, mitochondrial	Q99KI0	-1.19	0.014
	MIC60_MOUSE	Mitochondrial inner membrane protein	Q8CAQ8	-1.27	0.027
	TERA_MOUSE	Transitional endoplasmic reticulum ATPase	Q01853	-1.18	0.022
Cytoskeleton-associated proteins	SEPT5_MOUSE	Septin-5	Q9Z2Q6	1.26	0.0082
	ACTA_MOUSE	Actin, aortic smooth muscle	P62737	1.16	0.039
	ACTB_MOUSE	Actin, cytoplasmic 1	P60710	1.25	0.012
Molecular chaperones	HS90A_MOUSE	Heat shock protein HSP 90-alpha	P07901	-1.55	0.0089
Other proteins	CHM4B_MOUSE	Charged multivesicular body protein 4b	Q9D8B3	1.37	0.00011
	HBB1_MOUSE	Hemoglobin subunit beta-1	P02088	-1.52	0.0012
	NFL_MOUSE	Neurofilament light polypeptide	P08551	1.3	0.0023
	LGUL_MOUSE	Lactoylglutathione lyase	Q9CPU0	1.57	0.0023
	GSTM1_MOUSE	Glutathione S-transferase Mu 1	P10649	1.22	0.0026
	SNAG_MOUSE	Gamma-soluble NSF attachment protein	Q9CWZ7	1.23	0.0074
	HNRH1_MOUSE	Heterogeneous nuclear ribonucleoprotein H	O35737	-1.18	0.0082
	CBR3_MOUSE	Carbonyl reductase [NADPH] 3	Q8K354	-1.25	0.0083
	ODO2_MOUSE	Dihydrolipoyllysine-residue succinyltransferase component of	Q9D2G2	-1.12	0.0085
	BT3L4_MOUSE	Transcription factor BTF3 homolog 4	Q9CQH7	-1.46	0.0088
	PGAM1_MOUSE	Phosphoglycerate mutase 1	Q9DBJ1	-1.24	0.0093
	FUS_MOUSE	RNA-binding protein FUS	P56959	1.4	0.013
	PHB_MOUSE	Prohibitin	P67778	-1.1	0.015
	TPPP_MOUSE	Tubulin polymerization-promoting protein	Q7TQD2	1.29	0.018
	NT5C_MOUSE	5'(3')-deoxyribonucleotidase, cytosolic type	Q9JM14	1.25	0.02
	ODP2_MOUSE	Dihydrolipoyllysine-residue acetyltransferase component of p	Q8BMF4	1.25	0.022
	CLCB_MOUSE	Clathrin light chain B	Q6IRU5	1.18	0.025
	TPM1_MOUSE	Tropomyosin alpha-1 chain	P58771	1.18	0.036
	TBB2A_MOUSE	Tubulin beta-2A chain	Q7TMM9	1.05	0.044

## Sheet: 3xTg-1mg-kg-d vs 3xTg
Protein classification	Accession No.	Protein name	Uniport	3 xTg-1 versus 3 xTg
				Ratione	P-Value
ER stress-associated proteins	GRP78_MOUSE	78 kDa glucose-regulated protein	P20029	1.22	0.018
	PDIA3_MOUSE	Protein disulfide-isomerase A3	P27773	1.13	0.031
Oxidative stress-associated proteins	PRDX1_MOUSE	Peroxiredoxin-1	P35700	-1.35	0.032
Synaptic proteins	SYN2_MOUSE	Synapsin-2	Q64332	1.22	0.0025
	SYN1_MOUSE	Synapsin-1	O88935	1.1	0.0037
	DPYL2_MOUSE	Dihydropyrimidinase-related protein 2	O08553	1.26	0.0059
	SNP25_MOUSE	Synaptosomal-associated protein 25	P60879	-1.19	0.0081
	DYN1_MOUSE	Dynamin-1	P39053	1.19	0.02
	DPYL5_MOUSE	Dihydropyrimidinase-related protein 5	Q9EQF6	1.29	0.049
Mitochondrial respiration and metabolism	IDH3A_MOUSE	Isocitrate dehydrogenase [NAD] subunit alpha, mitochondrial	Q9D6R2	-1.34	0.0027
	ACON_MOUSE	Aconitate hydratase, mitochondrial	Q99KI0	1.29	0.0041
	NDUS1_MOUSE	NADH-ubiquinone oxidoreductase 75 kDa subunit, mitochondrial	Q91VD9	1.16	0.0053
	ATPA_MOUSE	ATP synthase subunit alpha, mitochondrial	Q03265	1.19	0.0073
	TERA_MOUSE	Transitional endoplasmic reticulum ATPase	Q01853	1.31	0.0084
	AT1A2_MOUSE	Sodium/potassium-transporting ATPase subunit alpha-2	Q6PIE5	-1.57	0.01
	ATPO_MOUSE	ATP synthase subunit O, mitochondrial	Q9DB20	-1.18	0.011
	QCR2_MOUSE	Cytochrome b-c1 complex subunit 2, mitochondrial	Q9DB77	1.19	0.019
	QCR1_MOUSE	Cytochrome b-c1 complex subunit 1, mitochondrial	Q9CZ13	1.09	0.025
	SCOT1_MOUSE	Succinyl-CoA:3-ketoacid coenzyme A transferase 1, mitochondr	Q9D0K2	1.16	0.036
	NDUV2_MOUSE	NADH dehydrogenase [ubiquinone] flavoprotein 2, mitochondria	Q9D6J6	-1.17	0.047
	SODM_MOUSE	Superoxide dismutase [Mn], mitochondrial	P09671	-1.35	0.014
Cytoskeleton-associated proteins	ACTB_MOUSE	Actin, cytoplasmic 1	P60710	-1.56	0.0049
	ACTA_MOUSE	Actin, aortic smooth muscle	P62737	-1.3	0.018
Molecular chaperones	1433Z_MOUSE	14-3-3 protein zeta/delta	P63101	-1.32	0.013
	1433E_MOUSE	14-3-3 protein epsilon	P62259	-1.5	0.0075
	HS90A_MOUSE	Heat shock protein HSP 90-alpha	P07901	1.5	0.013
	HS74L_MOUSE	Heat shock 70 kDa protein 4L	P48722	1.34	0.017
	HSP7C_MOUSE	Heat shock cognate 71 kDa protein	P63017	1.25	0.0032
Other proteins	MLF2_MOUSE	Myeloid leukemia factor 2	Q99KX1	-1.41	0.00049
	ALBU_MOUSE	Serum albumin	P07724	1.2	0.0011
	GLOD4_MOUSE	Glyoxalase domain-containing protein 4	Q9CPV4	-1.15	0.0021
	SNAG_MOUSE	Gamma-soluble NSF attachment protein	Q9CWZ7	-1.51	0.0024
	TPM1_MOUSE	Tropomyosin alpha-1 chain	P58771	-1.32	0.0063
	HNRH1_MOUSE	Heterogeneous nuclear ribonucleoprotein H	O35737	1.19	0.0072
	CAH2_MOUSE	Carbonic anhydrase 2	P00920	-1.19	0.0095
	VDAC1_MOUSE	Voltage-dependent anion-selective channel protein 1	Q60932	-1.18	0.0096
	G3P_MOUSE	Glyceraldehyde-3-phosphate dehydrogenase	P16858	-1.5	0.01
	TCPZ_MOUSE	T-complex protein 1 subunit zeta	P80317	1.34	0.012
	UCHL1_MOUSE	Ubiquitin carboxyl-terminal hydrolase isozyme L1	Q9R0P9	-1.19	0.013
	KCY_MOUSE	UMP-CMP kinase	Q9DBP5	-1.15	0.013
	TBB3_MOUSE	Tubulin beta-3 chain	Q9ERD7	1.37	0.015
	NSF_MOUSE	Vesicle-fusing ATPase	P46460	-1.53	0.016
	ODP2_MOUSE	Dihydrolipoyllysine-residue acetyltransferase component of p	Q8BMF4	1.22	0.018
	KPYM_MOUSE	Pyruvate kinase isozymes M1/M2	P52480	1.23	0.019
	VATB2_MOUSE	V-type proton ATPase subunit B, brain isoform	P62814	1.13	0.02
	CYBP_MOUSE	Calcyclin-binding protein	Q9CXW3	-1.18	0.02
	NT5C_MOUSE	5'(3')-deoxyribonucleotidase, cytosolic type	Q9JM14	-1.18	0.023
	AATM_MOUSE	Aspartate aminotransferase, mitochondrial	P05202	-1.19	0.03
	AMPH_MOUSE	Amphiphysin	Q7TQF7	-1.35	0.045
	TBB2A_MOUSE	Tubulin beta-2A chain	Q7TMM9	-1.16	0.047
	TBA1A_MOUSE	Tubulin alpha-1A chain	P68369	-1.28	0.047

## Sheet: 3xTg-10mg-kg-d vs 3xTg
Protein classification	Accession No.	Protein name	Uniport	3xTg-10 versus 3xTg
				Ratione	P-Value
ER stress-associated proteins	CALR_MOUSE	Calreticulin	P14211	-1.24	0.012
	GRP78_MOUSE	78 kDa glucose-regulated protein	P20029	1.35	0.037
Oxidative stress-associated proteins	PRDX6_MOUSE	Peroxiredoxin-6	O08709	1.82	0.044
Synaptic proteins	DPYL2_MOUSE	Dihydropyrimidinase-related protein 2	O08553	1.24	0.019
	SYN2_MOUSE	Synapsin-2	Q64332	1.15	0.049
Mitochondrial respiration and metabolism	NDUS1_MOUSE	NADH-ubiquinone oxidoreductase 75 kDa subunit, mitochondrial	Q91VD9	-1.34	0.025
	AATM_MOUSE	Aspartate aminotransferase, mitochondrial	P05202	-1.18	0.046
Cytoskeleton-associated proteins	ACTA_MOUSE	Actin, aortic smooth muscle	P62737	-1.32	0.018
	TPIS_MOUSE	Triosephosphate isomerase	P17751	1.11	0.042
	ACTB_MOUSE	Actin, cytoplasmic 1	P60710	-2.03	0.044
Molecular chaperones	NFM_MOUSE	Neurofilament medium polypeptide	P08553	-1.18	0.028
	HS74L_MOUSE	Heat shock 70 kDa protein 4L	P48722	-1.14	0.017
	1433G_MOUSE	14-3-3 protein gamma	P61982	1.2	0.046
Other proteins	KCRB_MOUSE	Creatine kinase B-type	Q04447	1.17	0.0072
	RSSA_MOUSE	40S ribosomal protein SA	P14206	-1.2	0.01
	QCR2_MOUSE	Cytochrome b-c1 complex subunit 2, mitochondrial	Q9DB77	1.3	0.012
	AT1A2_MOUSE	Sodium/potassium-transporting ATPase subunit alpha-2	Q6PIE5	-1.5	0.019
	ALDOA_MOUSE	Fructose-bisphosphate aldolase A	P05064	1.11	0.019
	NFL_MOUSE	Neurofilament light polypeptide	P08551	-1.12	0.024
	PEBP1_MOUSE	Phosphatidylethanolamine-binding protein 1	P70296	1.04	0.044
